# Supplementary material for: Connectomics Analysis Reveals First-, Second-, and Third-Order Thermosensory and Hygrosensory Neurons in the Adult Drosophila Brain
Source: PubMed Central journal article supplement (PMC7443704; doi:10.1016/j.cub.2020.06.028), 2020-08-17
Supplement: mmc1.pdf [file mmc1.pdf]

Current Biology, Volume 30

## Supplemental Information

### **Connectomics Analysis Reveals First-, Second-, and Third-Order Thermosensory and Hygrosensory Neurons in the Adult *Drosophila* Brain**

Elizabeth C. Marin, Laurin Büld, Maria Theiss, Tatevik Sarkissian, Ruairí J.V. Roberts, Robert Turnbull, Imaan F.M. Tamimi, Markus W. Pleijzier, Willem J. Laursen, Nik Drummond, Philipp Schlegel, Alexander S. Bates, Feng Li, Matthias Landgraf, Marta Costa, Davi D. Bock, Paul A. Garrity, and Gregory S.X.E. Jefferis

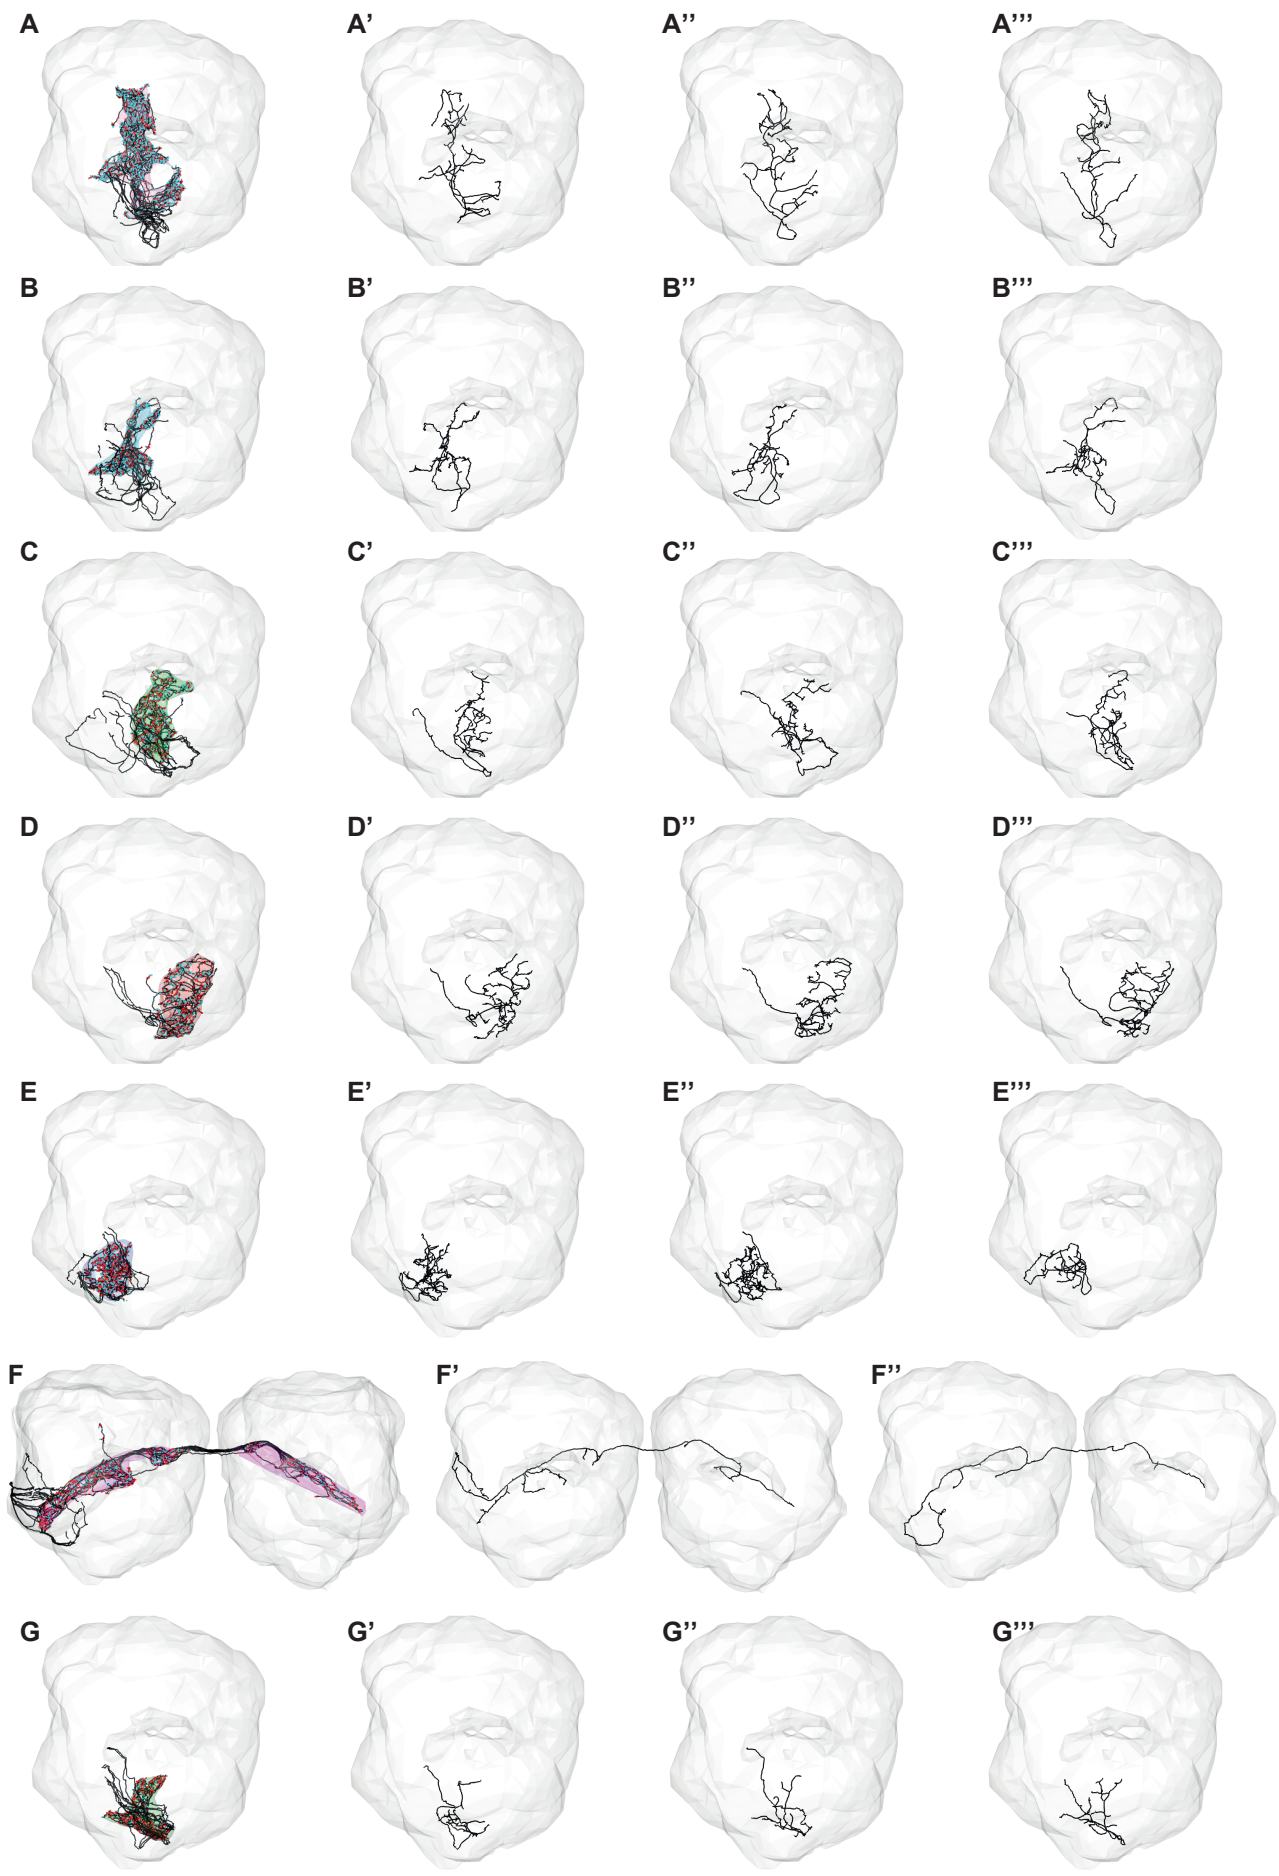

**Figure S1. Individual reconstructions reveal morphological stereotypy for seven distinct classes of VP sensory neurons, related to Figure 1.** Right antennal lobe, frontal view. Reconstructed neurons in black, with presynaptic sites in red and postsynaptic sites in cyan. **A-A'''**. Full population (9) and three completed examples of VP1d RNs. **B-B'''**. Full population (6) and three completed examples of VP1l RNs. **C-C'''**. Full population (6) and three completed examples of VP1m RNs. **D-D'''**. Full population (3) and three completed examples of VP2 RNs. **E-E'''**. Full population (4) and three completed examples of VP3 RNs. **E'''** depicts VP3RNbr#1 (the simpler, suspected non-aristal, RN). **F-F'''**. Full population (14) and two completed examples of VP4 RNs. **G-G'''**. Full population (9) and three completed examples of VP5 RNs.

**A** 0.0 0.5 1.0 1.5 2.0 2.5

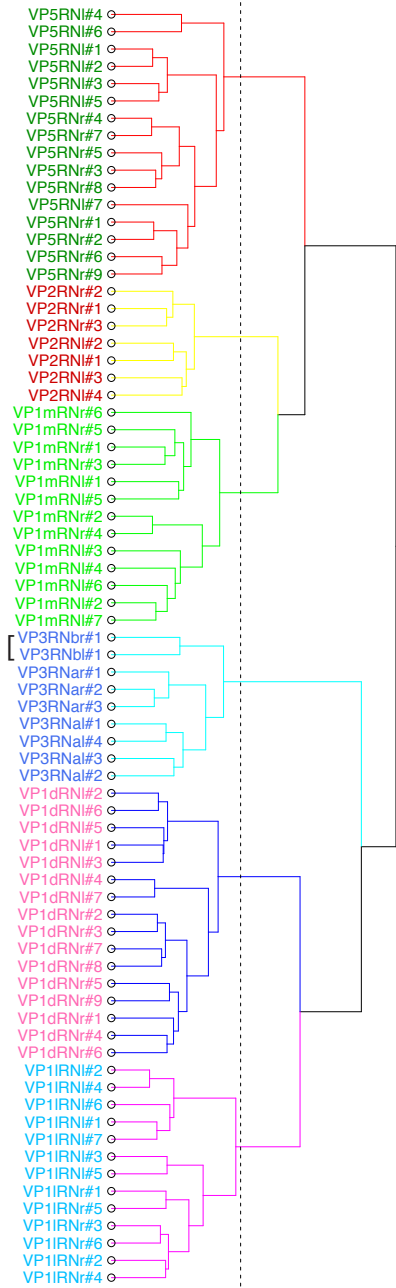

**B**

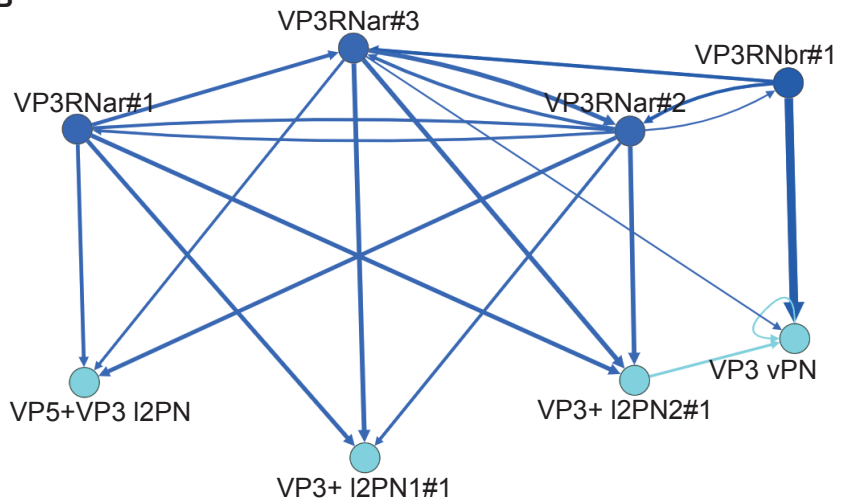

**C**

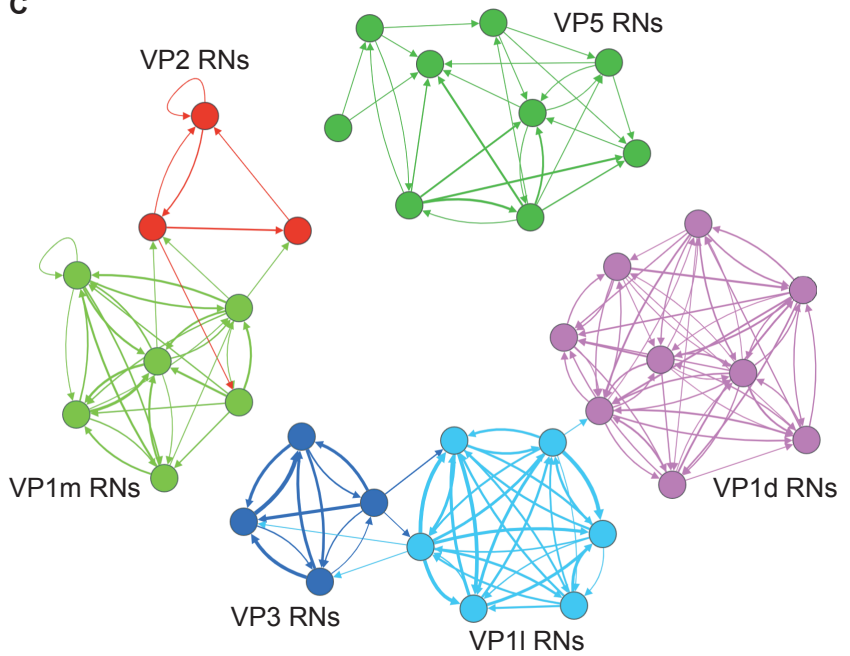

**Figure S2. There are seven distinct populations of thermosensory and hygroscopic neurons, related to Figure 1. A.** Morphological hierarchical clustering of the unilateral sensory neurons from both hemispheres. Cut at height 1.2 (dashed line) which groups the RNs by type. Neuron names are colour-coded by glomerulus. Bracket: simple VP3 TRNs. **B-C.** Connectivity graphs for thermo- and hygroscopic neuron populations. Arrow directions and thicknesses reflect direction of information flow and numbers of synaptic connections. Each circle (node) represents one neuron, colour-coded by class. **B.** The simpler VP3 TRN (VP3RNbr#1) provides input to the “slow-cool” VP3 vPN but not to VP5+VP3 IPN, VP3+IPN1#1, or VP3+IPN2#1. VP3RNar#1-3: remaining three (putative arista) VP3 TRNs. Edges of <3 connections have been omitted for visual clarity. **C.** VP1d, VP1l, and VP1m sensory neurons constitute three separate populations.

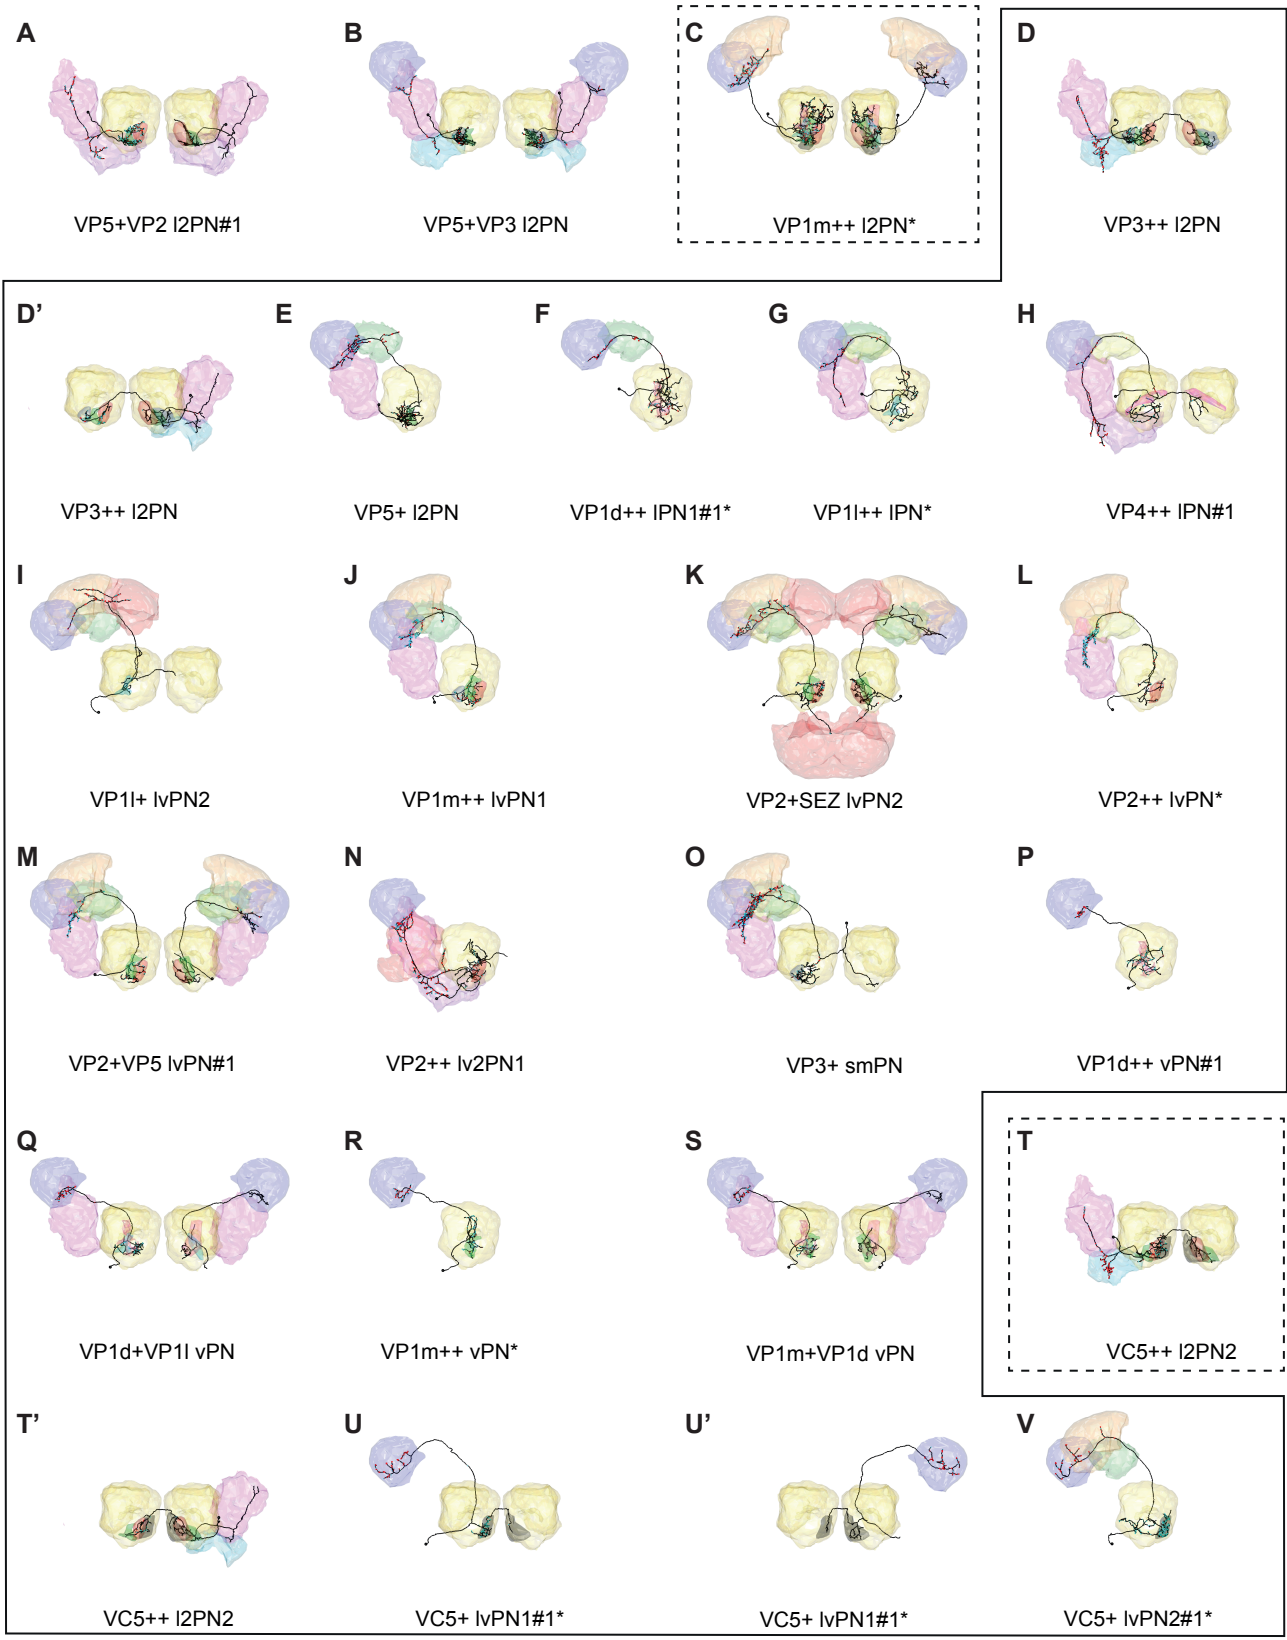

**Figure S3. Additional types of putative thermo- and hygro-sensory PNs, related to Table 1.** Frontal views of reconstructions (black) of additional candidate thermo- and hygro-sensory PNs that innervate VP glomeruli (colour-coded as in Figure 1B-B', non-VP glomeruli in grey). Presynaptic sites in red and postsynaptic sites in cyan. Brain neuropils colour-coded as in Figure 2C. Asterisks: primarily olfactory PNs. Black outline: candidate novel thermosensory PNs. Dashed outline: PNs previously described but not recognised as VP/thermosensory, or associated with the wrong glomeruli.

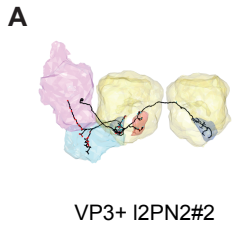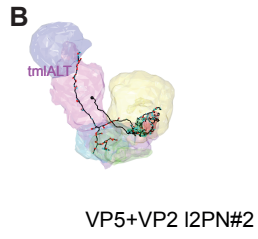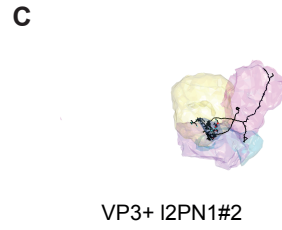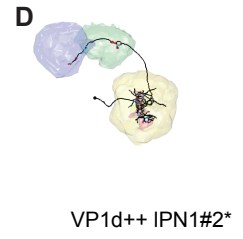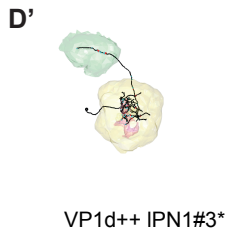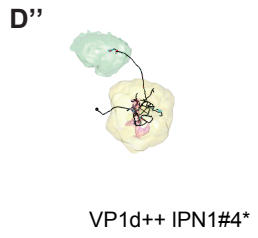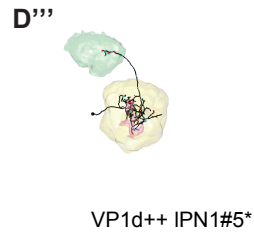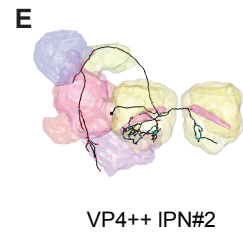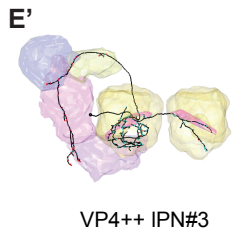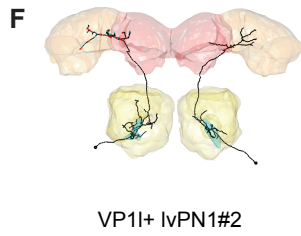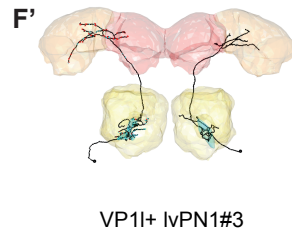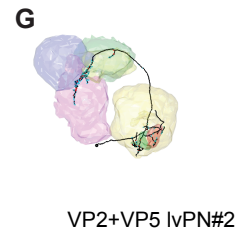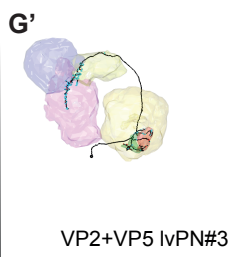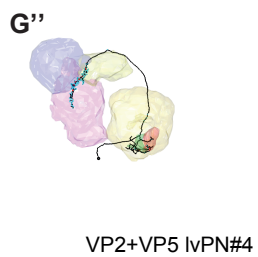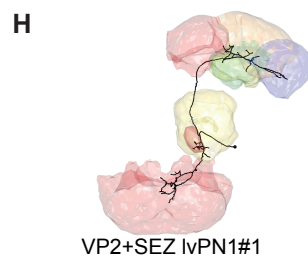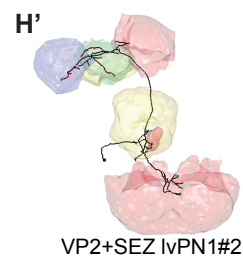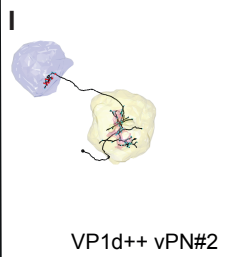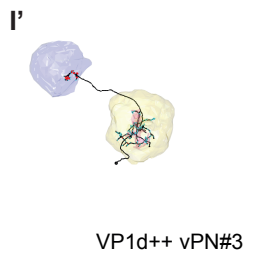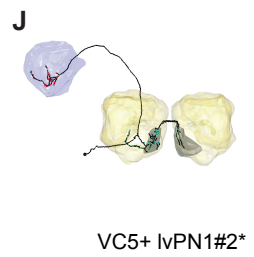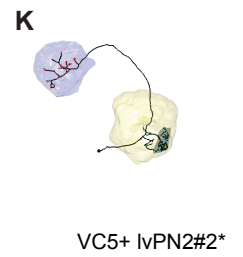



**Figure S4. Extra examples of putative thermo- and hygro-sensory PN types, related to Table 1.** Frontal views of reconstructions (black) of additional candidate thermo- and hygro-sensory PNs that innervate VP glomeruli (colour-coded as in Figure 1B-B', non-VP glomeruli in grey). Presynaptic sites in red and postsynaptic sites in cyan. Brain neuropils colour-coded as in Figure 2C. Asterisks: primarily olfactory PNs. Black outline: candidate novel thermosensory PNs.

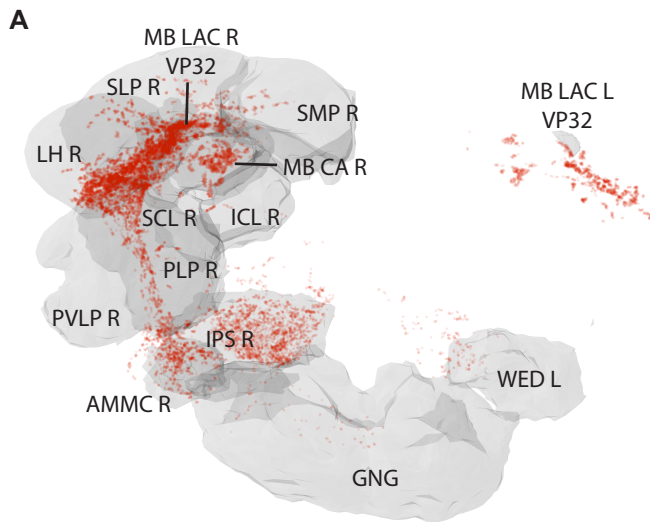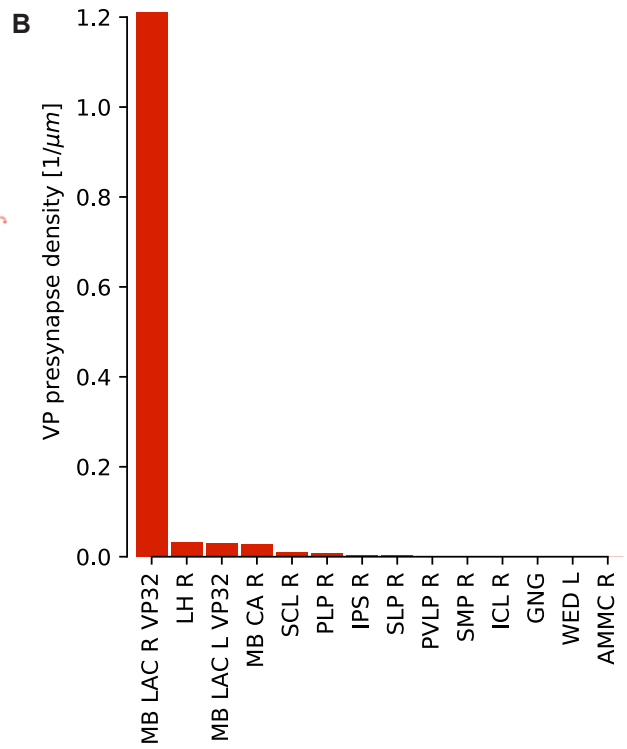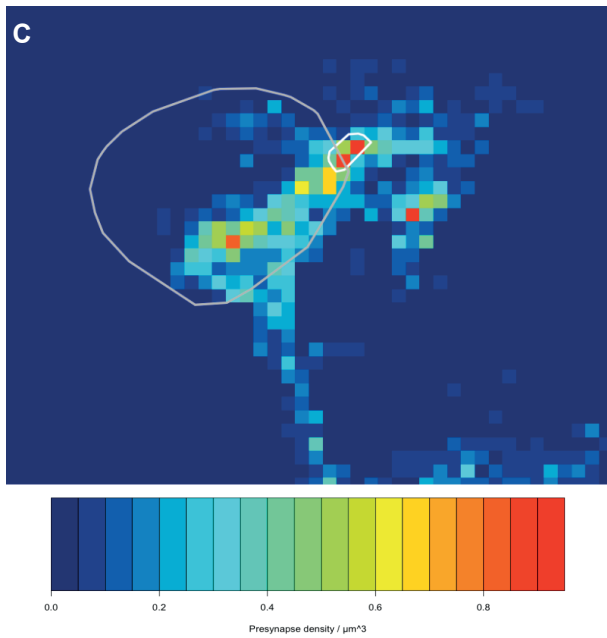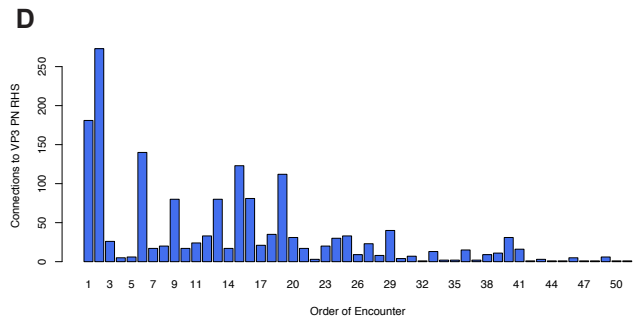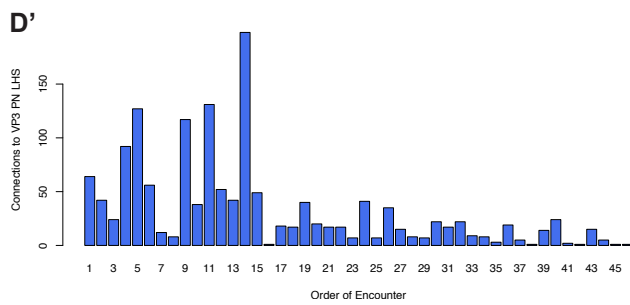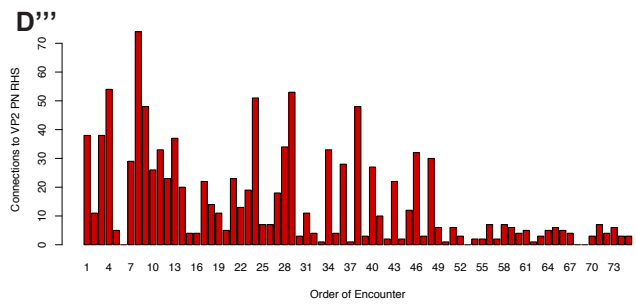

**Figure S5. Random sampling to define circuitry in the IACA, the neuropil most densely targeted by VP PNs, related to Figure 4. A.** Presynapses of all RHS AL VP PNs, plotted with neuropil volumes. AMMC R: RHS antennal mechanosensory and motor centre. MB CA R: RHS mushroom body calyx. ICL R: RHS inferior clamp. IPS R: RHS inferior posterior slope. LH: RHS lateral horn. MB LAC R VP32: RHS lateral accessory calyx. MB LAC L VP32: LHS lateral accessory calyx. PLP R: RHS posterior lateral protocerebrum. PVLP R: RHS posterior ventral protocerebrum. SCL R: RHS superior clamp. GNG: suboesophageal zone. SLP R: RHS superior lateral protocerebrum. SMP R: RHS superior medial protocerebrum. WED L: LHS wedge. **B.** VP PN presynapse density plotted in each neuropil (abbreviations as in A). **C.** VP PN presynapse density (presynapses/ cubic micron), with LH and IACA outlined in white. **D-D''.** Histograms depicting connection strength of recovered novel hits from successive sampling of randomised postsynaptic profiles downstream of the RHS and LHS VP3 PN and the RHS VP2 PN in the IACA.

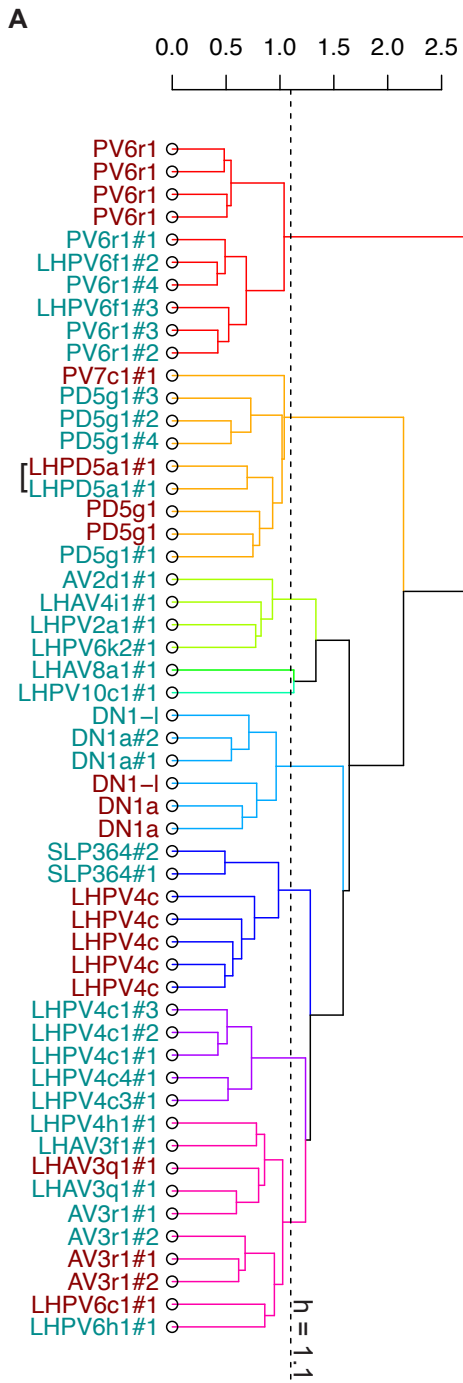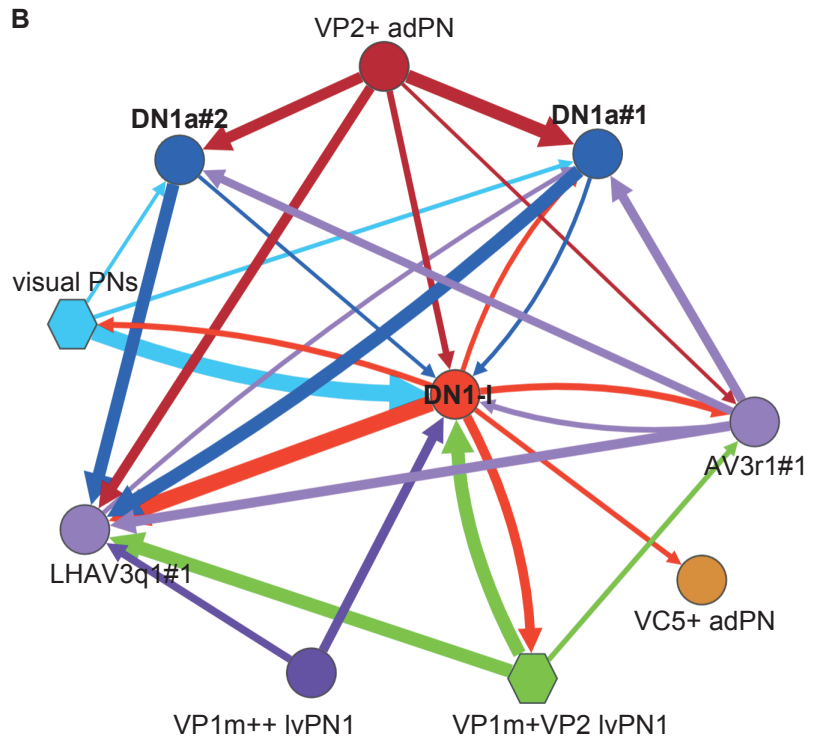

**Figure S6. Non-Kenyon cell IACA circuit neuron stereotypy and connectivity, related to Figure 5. A.** Morphological hierarchical clustering of non-KC IACA neurons using NBLAST. Cut at height 1.1 (dashed line) to retrieve groups by neuron type. Dark cyan: RHS targets. Dark red: LHS targets. Square brackets: unique neurons matched across hemispheres. **B.** Connectivity graph showing that DN1a#1 and DN1a#2 have similar connectivity, distinct from that of DN1-l. Each circle (node) represents one neuron and each hexagon represents multiple pooled neurons of the same modality. Arrow directions and thicknesses reflect direction of information flow and numbers of synaptic connections. Edges of <10 connections and the VP3 vPN and VP2 adPN have been omitted for clarity.

| SKID     | NAME       | SIDE | VP3 | VP2 | LACA | LP | VP | OTHER                       |
|----------|------------|------|-----|-----|------|----|----|-----------------------------|
| 5816884  | KCg-s2R    | RHS  | 138 | 48  | 187  | 9  | 11 | AV3f2#1, DN1-l, mPN, visual |
| 4181431  | tKCa'b'R#1 | RHS  | 26  | 48  | 75   | 0  | 0  | NA                          |
| 5824701  | tKCa'b'R#2 | RHS  | 33  | 34  | 67   | 0  | 0  | NA                          |
| 6279367  | tKCa'b'R#3 | RHS  | 31  | 32  | 63   | 0  | 0  | NA                          |
| 8799774  | KCa'b'R#1  | RHS  | 31  | 22  | 53   | 0  | 0  | VL2p                        |
| 4182914  | KCa'b'R#2  | RHS  | 23  | 38  | 61   | 0  | 0  | DC1                         |
| 8139894  | KCa'b'R#3  | RHS  | 24  | 30  | 57   | 0  | 20 | NA                          |
| 5824641  | KCa'b'R#4  | RHS  | 15  | 38  | 53   | 0  | 0  | V, DL2d                     |
| 5832021  | KCa'b'R#5  | RHS  | 16  | 26  | 43   | 16 | 0  | (DA4I)                      |
| 8821288  | KCa'b'R#6  | RHS  | 17  | 27  | 45   | 11 | 0  | NA                          |
| 5813673  | KCa'b'R#7  | RHS  | 13  | 33  | 49   | 0  | 0  | VC1                         |
| 4180842  | KCa'b'R#8  | RHS  | 17  | 21  | 41   | 5  | 0  | DA2                         |
| 478805   | KCa'b'R#9  | RHS  | 9   | 23  | 32   | 0  | 0  | DP1I                        |
| 16274    | KCa'b'R#10 | RHS  | 2   | 5   | 7    | 4  | 31 | VL2p                        |
| 175027   | KCa'b'R#11 | RHS  | 1   | 4   | 11   | 31 | 11 | NA                          |
| 8808581  | KCa'b'R#12 | RHS  | 0   | 4   | 7    | 18 | 0  | DP1m, (VL2a), (DC1)         |
| 9117955  | KCa'b'R#13 | RHS  | 0   | 0   | 11   | 14 | 0  | NA                          |
| 9210     | KCgR#1     | RHS  | 0   | 3   | 17   | 25 | 0  | DC1, DP1I, VA3, VA7I, VL2a  |
| 5459431  | KCgR#2     | RHS  | 1   | 6   | 7    | 1  | 0  | VC3m, DL5, DA4I             |
| 8808541  | KCgR#3     | RHS  | 2   | 5   | 15   | 16 | 6  | VL2a, DA2, VP1m + VP5       |
| 8808887  | KCgR#4     | RHS  | 0   | 4   | 6    | 15 | 0  | DL2d, VC3m, DA4I, DM4       |
| 8822544  | KCgR#5     | RHS  | 1   | 3   | 19   | 8  | 0  | VC3I, DL2v                  |
| 8142     | KCgR#6     | RHS  | 1   | 3   | 6    | 27 | 0  | DM4, DP1I, VA4, DM3, V      |
| 10228816 | KCgR#7     | RHS  | 0   | 0   | 14   | 13 | 0  | DC1, DP1m, VC3m             |
| 10586365 | KCgR#8     | RHS  | 0   | 0   | 5    | 5  | 0  | DC1, (VC1)                  |
| 8361575  | KCgR#9     | RHS  | 0   | 0   | 10   | 4  | 20 | (DA2), DA4I, DM5            |
| 36909    | KCgR#10    | RHS  | 1   | 1   | 7    | 23 | 0  | DP1I, VA6, VC3m             |
| 10527316 | KCgR#11    | RHS  | 1   | 0   | 6    | 13 | 0  | DC1, DP1m, V, VC3m          |
| 8798     | KCg-s1R    | RHS  | 4   | 0   | 4    | 3  | 0  | (AV3f2#1), visual           |
| 8853436  | KCg-s2L    | LHS  | 92  | 18  | 111  | 6  | 3  | AV3f2#1, (mPN), visual      |
| 8854339  | tKCa'b'L#1 | LHS  | 41  | 8   | 51   | 1  | 0  | NA                          |
| 8880337  | tKCa'b'L#2 | LHS  | 24  | 18  | 42   | 0  | 0  | NA                          |
| 8884784  | tKCa'b'L#3 | LHS  | 17  | 14  | 31   | 0  | 0  | NA                          |
| 8867359  | KCa'b'L#1  | LHS  | 38  | 19  | 57   | 3  | 0  | VL2p                        |
| 8885938  | KCa'b'L#2  | LHS  | 42  | 6   | 48   | 0  | 0  | (VA7I)                      |
| 8851349  | KCa'b'L#3  | LHS  | 15  | 23  | 38   | 0  | 0  | (DP1m), (VM1)               |
| 8866744  | KCa'b'L#4  | LHS  | 22  | 14  | 36   | 0  | 5  | NA                          |
| 8869397  | KCa'b'L#5  | LHS  | 20  | 12  | 37   | 8  | 0  | NA                          |
| 8848927  | KCa'b'L#6  | LHS  | 17  | 11  | 28   | 0  | 0  | (DP1I)                      |
| 8877321  | KCa'b'L#7  | LHS  | 24  | 4   | 28   | 6  | 0  | VM1                         |
| 8847299  | KCa'b'L#8  | LHS  | 7   | 19  | 28   | 9  | 0  | V                           |
| 8870427  | KCa'b'L#9  | LHS  | 8   | 15  | 23   | 14 | 0  | (VM1)                       |
| 8864744  | KCa'b'L#10 | LHS  | 14  | 6   | 21   | 10 | 0  | NA                          |

|         |            |     |    |   |    |    |   |                         |
|---------|------------|-----|----|---|----|----|---|-------------------------|
| 8869803 | KCa'b'L#11 | LHS | 8  | 8 | 17 | 12 | 4 | NA                      |
| 8865424 | KCa'b'L#12 | LHS | 5  | 7 | 13 | 10 | 5 | NA                      |
| 9942769 | KCgL#1     | LHS | 12 | 6 | 32 | 4  | 0 | DC2, DM3,<br>VA5, (VM3) |
| 8865505 | KCgL#2     | LHS | 3  | 0 | 6  | 12 | 0 | DL2v, DM4,<br>DM5, DP1m |
| 8865603 | KCgL#3     | LHS | 1  | 2 | 10 | 17 | 0 | VA3, VM2,<br>VL2p       |

**Table S1. Table of IACA-associated Kenyon cells and their inputs, related to Figure 4.**

SKID: Kenyon cell skeleton ID. NAME: our assigned name. SIDE: brain hemisphere. VP3, VP2, LACA: Number of inputs from the VP3 vPN, VP2 adPN, and all IACA PNs, within the IACA. LP: Number of inputs from IACA PNs outside of the IACA. VP: Number of inputs from other VP PNs outside of the IACA. OTHER: Other inputs, including from IACA targets (Figure 5).



| NEW NAME         | PAN | SKID_R   | SKID_L   | FC MATCH        | SCORE | NAMES             | DRIVER          | SCORE |
|------------------|-----|----------|----------|-----------------|-------|-------------------|-----------------|-------|
| LHAV3q1#1        | 5B  | 2315173  | 8873592  | VGlut-F-200441? | 0.643 |                   | R64A07          | 0.677 |
| AV3r1#1          | 5C  | 6852116  | 9018826  | VGlut-F-200441? | 0.496 |                   | R64A07          | 0.690 |
| DN1a#1           | 5D  | 4129363  | 8867611  |                 | NA    | DN1a [2]          | R43D05 [44]     | 0.648 |
| PD5g1#1          | 5H  | 11210831 | 8883836  | Gad1-F-000010?  | 0.469 |                   |                 | NA    |
| DN1a#2           | 5D' | 3973434  | 9362353  |                 | NA    | DN1a [2]          | R43D05 [44]     | 0.650 |
| LHPD5a1#1        | 5I  | 5982276  | 8865547  | Gad1-F-000010?  | 0.487 |                   | R91C09?         | NA    |
| DN1-I            | 5E  | 11524453 | 8876600  |                 | NA    |                   | R18H11; R91C09? | 0.511 |
| LHPV4c1#1        | 5F  | 6292583  | 8853753  | VGlut-F-800074  | 0.671 |                   | R64A07          | 0.696 |
| LHPV4c1#2        | 5F' | 3968249  | 8883804  | VGlut-F-800074  | 0.661 |                   | R64A07          | 0.668 |
| PV6r1#1          | 5K  | 4214681  | 8867765  |                 | NA    |                   | R80C12          | 0.458 |
| VP2+ adPN        | 2G  | 1712057  | 8864990  |                 | NA    |                   |                 | NA    |
| VP2 adPN         | 2O  | 57516    | 9159128  | Gad1-F-000090   | 0.615 | VP2 uACT1 [3]     | R21C11          | 0.568 |
| LHAV3f1#1        | 5G  | 11545803 | 9711486  | VGlut-F-200021  | 0.681 | AV3e1#1 [4]       |                 | NA    |
| PV6r1#2          |     | 4182361  | 8870514  |                 | NA    |                   | R80C12          | 0.501 |
| AV3r1#2          |     | 1309241  | 9159383  |                 | NA    |                   | R64A07          | 0.663 |
| LHPV4c1#3        |     | 1120955  | 8854268  | VGlut-F-800074  | 0.688 |                   | R64A07          | 0.735 |
| VP1m+VP2 IvPN1#3 | 3F" | 57114    | 13931917 |                 | NA    |                   | R42H11          | 0.483 |
| LHAV2d1#1        | 5J  | 11543519 | 2610603  |                 | NA    | AV2d1#1 [4]       |                 |       |
| LHPV4c3#1        |     | 5605174  | 8872558  | VGlut-F-800074  | 0.558 |                   | R64A07          | 0.684 |
| VP1m+ IvPN1      | 3K  | 192430   | 9588978  | VGlut-F-700270? | 0.579 |                   | R31H04?         | 0.539 |
| PD5g1#2          |     | 4294123  | 8875932  | Gad1-F-000010   | 0.542 |                   |                 | NA    |
| LHPV4c4#1        |     | 1091854  | 8880798  | VGlut-F-800074  | 0.593 |                   | R64A07          | 0.683 |
| LHAV4i1#1        |     | 3439570  |          | Gad1-F-200137   | 0.649 |                   |                 | NA    |
| PV6r1#3          |     | 4182148  | 8896969  |                 | NA    |                   | R80C12          | 0.515 |
| VC5+ adPN*       | 2N  | 39254    | 3420237  | Cha-F-200265    | 0.579 | VM6+VP 1 adPN [5] |                 | NA    |
| PPL202#1         |     | 30571    |          | TH-F-000011     | 0.610 |                   |                 | NA    |
| LHPV6k2#1        |     | 5062598  |          | Gad1-F-400027   | 0.625 |                   | 32G09?          | 0.631 |
| VP1m+VP2 IvPN1#1 | 3F  | 57122    | 9101937  |                 | NA    |                   | R31H04          | 0.629 |
| LHPV6f1#3        |     | 5824712  | 8877293  |                 | NA    |                   | R80C12          | 0.509 |
| PV6r1#4          |     | 11128057 |          |                 | NA    |                   | R80C12          | 0.594 |
| PD5g1#3          |     | 9951834  | 8880131  | Gad1-F-000010   | 0.578 |                   |                 | NA    |
| SLP364#1         |     | 6292328  |          |                 | NA    |                   | R10G01          | 0.631 |
| LHPV2a1#1        |     | 79579    |          | Cha-F-300168    | 0.697 |                   | R37F05          | 0.615 |
| LHPV6f1#2        |     | 8808525  |          |                 | NA    |                   | R80C12          | 0.526 |
| PD5g1#4          |     | 8820702  |          | Gad1-F-000010   | 0.638 |                   |                 | NA    |
| LHPV10c1#1       | 6E  | 369583   |          |                 | NA    |                   |                 | NA    |
| LHAV8a1#1        |     | 57110    |          |                 | NA    |                   |                 | NA    |
| LHPV6h1#1        |     | 9069835  |          |                 | NA    |                   |                 | NA    |
| SLP364#2         |     | 6292134  |          |                 | NA    |                   | R10G01          | 0.613 |
| VP1m+VP2 IvPN1#2 | 3F' | 57059    | 12681995 |                 | NA    |                   | R31H04          | 0.605 |
| LHPV4h1#1        |     | 4044728  |          | Cha-F-500298    | NA    |                   |                 | NA    |
| LHPV6c1#1        |     |          | 2466931  |                 | NA    |                   |                 | NA    |
| PV7c1#1          |     |          | 8880705  | Cha-F-000074    | 0.549 |                   |                 | NA    |

**Table S2. Table of IACA-associated non-Kenyon cells, related to Figure 5.** NEW NAME: our designation, based on neuroblast lineage or lateral horn tract [67]. PAN: Figure panel where example is plotted. SKID\_R: skeleton ID of RHS example. SKID\_L: skeleton ID of LHS example. FC MATCH: best corresponding single-cell clone in FlyCircuit. SCORE: Average of forward and reverse NBLAST scores for Fly Circuit match. NAMES: Names used in previous publications. DRIVER: best corresponding sparse driver line. SCORE: Forward NBLAST scores for Fly Light match.

| <b>TYPE</b>    | <b>SKID1</b> | <b>SKID2</b> | <b>SKID3</b> | <b>SKID4</b> |
|----------------|--------------|--------------|--------------|--------------|
| VC5++ I2PN1*   | 1363077      | 8825246      |              |              |
| VC5++ I2PN2    | 8406430      |              |              |              |
| VP1d il2PN     | 192423       | 203504       |              |              |
| VP1d++ vPN     | 3813442      | 3813447      | 4632023      |              |
| VP1d+VP1I vPN  | 3813438      |              |              |              |
| VP1d+VP4 I2PN1 | 23005        |              |              |              |
| VP1d+VP4 I2PN2 | 3908507      |              |              |              |
| VP1I+VP3 ilPN  | 57487        | 57495        |              |              |
| VP1m I2PN      | 11524119     |              |              |              |
| VP1m+ IvPN     | 192430       |              |              |              |
| VP1m++ IvPN    | 57142        |              |              |              |
| VP1m+VP2 IvPN1 | 57059        | 57114        | 57122        |              |
| VP1m+VP2 IvPN2 | 4058666      |              |              |              |
| VP1m+VP5 ilPN  | 46105        | 57503        |              |              |
| VP2 adPN       | 57516        |              |              |              |
| VP2 I2PN       | 5672990      |              |              |              |
| VP2+ adPN      | 1712057      |              |              |              |
| VP2++ Iv2PN    | 4002166      |              |              |              |
| VP2+SEZ IvPN1  | 57146        | 57166        |              |              |
| VP2+SEZ IvPN2  | 57063        |              |              |              |
| VP2+VC5 I2PN   | 2600341      |              |              |              |
| VP2+VP5 IvPN   | 57051        | 57134        | 57138        | 1372988      |
| VP3 vPN        | 5471515      |              |              |              |
| VP3+ IPN1      | 11234968     |              |              |              |
| VP3+ IPN2      | 1356477      | 4869882      |              |              |
| VP3+VP1I IvPN  | 37513        | 45882        |              |              |
| VP4 vPN        | 1149173      |              |              |              |
| VP4+ vPN       | 2484510      |              |              |              |
| VP5 I2PN       | 4672650      |              |              |              |
| VP5+ I2PN      | 10078400     |              |              |              |
| VP5+SEZ adPN   | 14003783     |              |              |              |
| VP5+VP2 I2PN   | 4876532      | 5946848      |              |              |
| VP5+VP3 I2PN   | 4671556      |              |              |              |

**Table S3. Table of PNs pooled for downstream target analysis, related to Figure 6.**  
TYPE: our designated morphological type, as in Table 1. SKID: Skeleton ID.

## SUPPLEMENTAL REFERENCES

1. Frechter, S., Bates, A.S., Tootoonian, S., Dolan, M.-J., Manton, J., Jamasb, A.R., Kohl, J., Bock, D., and Jefferis, G. (2019). Functional and anatomical specificity in a higher olfactory centre. *Elife* 8. Available at: <http://dx.doi.org/10.7554/eLife.44590>.
2. Shafer, O.T., Helfrich-Förster, C., Renn, S.C.P., and Taghert, P.H. (2006). Reevaluation of *Drosophila melanogaster*'s neuronal circadian pacemakers reveals new neuronal classes. *J. Comp. Neurol.* 498, 180–193.
3. Sekiguchi, M., Inoue, K., Yang, T., Luo, D.-G., and Yoshii, T. (2020). A Catalog of GAL4 Drivers for Labeling and Manipulating Circadian Clock Neurons in. *J. Biol. Rhythms* 35, 207–213.
4. Stocker, R.F., Lienhard, M.C., Borst, A., and Fischbach, K.F. (1990). Neuronal architecture of the antennal lobe in *Drosophila melanogaster*. *Cell Tissue Res.* 262, 9–34.
5. Huoviala, P., Dolan, M.-J., Love, F.M., Frechter, S., Roberts, R.J.V., Mitrevica, Z., Schlegel, P., Bates, A.S., Aso, Y., Rodrigues, T., *et al.* (2018). Neural circuit basis of aversive odour processing in *Drosophila* from sensory input to descending output. *bioRxiv*, 1180. Available at: <http://dx.doi.org/10.1101/394403>.
6. Yu, H.-H., Kao, C.-F., He, Y., Ding, P., Kao, J.-C., and Lee, T. (2010). A complete developmental sequence of a *Drosophila* neuronal lineage as revealed by twin-spot MARCM. *PLoS Biol.* 8. Available at: <http://dx.doi.org/10.1371/journal.pbio.1000461>.
7. Bates, A.S., Schlegel, P., Roberts, R.J.V., Drummond, N., Tamimi, I.F.M., Turnbull, R., Zhao, X., Marin, E.C., Popovici, P.D., Dhawan, S., *et al.* (2020). Complete connectomic reconstruction of olfactory projection neurons in the fly brain. *bioRxiv*, 9. Available at: <https://www.biorxiv.org/content/10.1101/2020.01.19.911453v1>.
8. Zheng, Z., Lauritzen, J.S., Perlman, E., Robinson, C.G., Nichols, M., Milkie, D., Torrens, O., Price, J., Fisher, C.B., Sharifi, N., *et al.* (2018). A Complete Electron Microscopy Volume of the Brain of Adult *Drosophila melanogaster*. *Cell* 174, 730–743.e22.
9. Zheng, Z., Li, F., Fisher, C., Ali, I.J., Sharifi, N., Calle-Schuler, S., Hsu, J., Masoodpanah, N., Kmecova, L., Kazimiers, T., *et al.* (2020). Structured sampling of olfactory input by the fly mushroom body. *bioRxiv*, 8393. Available at: <https://www.biorxiv.org/content/10.1101/2020.04.17.047167v2>.
10. Dolan, M.-J., Frechter, S., Bates, A.S., Dan, C., Huoviala, P., Roberts, R.J., Schlegel, P., Dhawan, S., Tabano, R., Dionne, H., *et al.* (2019). Neurogenetic dissection of the lateral horn reveals major outputs, diverse behavioural functions, and interactions with the mushroom body. *Elife* 8. Available at: <http://dx.doi.org/10.7554/eLife.43079>.
